# Supplementary material for: Innate Immune Cells and C-Reactive Protein in Acute First-Episode Psychosis and Schizophrenia: Relationship to Psychopathology and Treatment
Source: Oxford University Press journal article supplement (doi:10.1093/schbul/sbz068), 2019-06-05
Supplement: sbz068_suppl_supplementary_tables.doc [file sbz068_suppl_supplementary_tables.doc]

**Supplementary Table 1:** Representative subgroup (n=240), showing the same kind of diagnosis-related changes in differential blood count and CRP like the whole study cohort (Table 1, n=545). In these subjects, additional serum measures of neutrophil and monocyte activation (green front) were available from a previous study.[17](#_ENREF_17)

*Abbreviations:* C, controls; FEP, first-episode psychosis cohort; corrected PANSS scores: i.e. subtraction of minimum scores representing ‘no symptoms’ from the Positive and Negative Syndrome Scale (PANSS) scores; Sz, schizophrenia cohort.

*Annotations:* Data are presented as median (quartile 1; quartile 3; sample size); significant *p*-values are highlighted in green; * *p*< 0.05, ** *p*< 0.01, *** *p*< 0.001.

**Supplementary Table 2:** FDR-corrected correlation of white blood cell counts or CRP with PANSS scores at baseline (T0).

*Abbreviations:* FEP, first-episode psychosis cohort; corrected PANSS scores: i.e. subtraction of minimum scores representing ‘no symptoms’ from the Positive and Negative Syndrome Scale (PANSS) scores; Sz, schizophrenia cohort.

*Annotations:* Significant *p*-values are highlighted in green; * *p*< 0.05, ** *p*< 0.01.
